# Supplementary material for: Using a Reconciliation Module Leads to Large Gains in Evolution Acceptance
Source: PubMed Central journal article supplement — CBE Life Sci Educ. 2019 Winter;18(4):ar58. doi: 10.1187/cbe.19-04-0080 (PMC8727060; doi:10.1187/cbe.19-04-0080), 2019
Supplement: cbe-18-ar58-s001.pdf [file cbe-18-ar58-s001.pdf]

# Supplemental Material

*CBE—Life Sciences Education*

Lindsay *et al.*

## Survey Questions

1. What is your current age? \_\_\_\_\_
2. Gender
  - a. Male
  - b. Female
  - c. Prefer not to answer
3. What is your home geographic region of the US?
  - a. Northeast (New England)
  - b. Northeast (Mid-Atlantic)
  - c. Midwest (East North Central)
  - d. Midwest (West North Central)
  - e. South (Atlantic)
  - f. South (East South Central)
  - g. South (West South Central)
  - h. West (Mountain)
  - i. West (Pacific)
  - j. Not from the US
4. What is your faith tradition?
  - a. Baptist
  - b. Catholic
  - c. Christian (non-denominational)
  - d. Church of Christ/Disciples of Christ
  - e. Congregational
  - f. Episcopalian/Anglican
  - g. Jehovah's Witness
  - h. Jewish
  - i. LDS (Mormon)
  - j. Lutheran
  - k. Methodist/Wesleyan
  - l. Orthodox (Eastern)
  - m. Pentecostal/Charismatic
  - n. Protestant (Other)
  - o. Reformed/Presbyterian
  - p. Seventh-day Adventist
  - q. Agnostic
  - r. Atheist
  - s. Other, please specify \_\_\_\_\_
5. What kind of high school did you attend?
  - a. Public
  - b. Public Charter
  - c. Private
  - d. Private religious
  - e. Homeschool
6. What year in school are you?
  - a. Freshman
  - b. Sophomore
  - c. Junior
  - d. Senior

7. In which category is your Major?
  - a. Natural Sciences (STEM)
  - b. Social Sciences
  - c. Arts & Humanities
  - d. Professional Studies
  - e. Religion & Philosophy
  - f. Other, please specify \_\_\_\_\_
8. What is the highest level of education obtained by either parent?
  - a. No diploma or degree
  - b. High school diploma
  - c. Some college
  - d. 4-year college degree
  - e. Master's Degree
  - f. Terminal Degree (PhD, MD, DDS, JSD, etc.)
9. Did one or both of your parents attend or graduate from (INSERT INSTITUTIONAL NAME) (Please mark ALL that apply)?
  - a. Father, attend
  - b. Father, graduate
  - c. Mother, attend
  - d. Mother, graduate
  - e. Neither attended
10. What courses have you taken in high school? (Mark all that apply.)
  - a. Earth Science
  - b. General biology
  - c. AP biology
  - d. Specialty biology (e.g. marine, environmental, etc.)
  - e. None of the above
11. To what extent did your high school biology course teach the topic of evolution?
  - a. Strong coverage
  - b. Average coverage
  - c. Weak coverage
  - d. No coverage
12. Did your high school teacher reveal personal views about evolution?
  - a. No, my high school teacher revealed no personal views.
  - b. Yes, my high school teacher clearly opposed evolution.
  - c. Yes, my high school teacher clearly supported evolution.
13. What was your reaction to the topic of evolution as taught in your high school biology course?
  - a. It was not taught in my high school
  - b. Acceptance without conflict
  - c. Concern about the validity of evolution
  - d. Feelings of mild conflict
  - e. Feelings of severe conflict leading to rejection of evolution
  - f. Feelings of neutrality; no strong reaction either way
14. How active were you in a religious community during high school?
  - a. Approximately weekly
  - b. Approximately monthly
  - c. Approximately quarterly

- d. Religious holidays only
  - e. Not at all
15. How often did you regularly receive biblical/scriptural training outside of weekly worship services during high school?
- a. Approximately daily
  - b. Approximately weekly
  - c. Approximately monthly
  - d. Approximately quarterly
  - e. Not at all
16. How do you understand the “six days of creation” in the Book of Genesis?
- a. They are six consecutive twenty-four-hour days
  - b. They are six twenty-four-hour days with gap(s) of time
  - c. They are six periods of time of unknown length
  - d. They are six figurative days, not to be understood as real periods of time
  - e. I am not sure
17. Was evolution ever discussed in your religious community?
- a. Yes
  - b. No
  - c. I am not sure
  - d. I have not been affiliated with any religious community
18. How does your religious community view evolutionary theory?
- a. positively
  - b. neutral
  - c. negatively
  - d. My religious community has both positive and negative views about evolutionary theory
  - e. I do not participate in a religious community
19. What has been the most influential source of information for your opinion regarding evolutionary theory? (Please rank the following on a scale from 1 to 5, 1 being MOST influential and 5 being LEAST influential)
- \_\_\_ Family
  - \_\_\_ Local clergy, local pastor, or youth leader
  - \_\_\_ Official Church authorities and/or publications
  - \_\_\_ Other sources (books, internet, magazines)
  - \_\_\_ Textbooks
20. Have you recently heard or read a statement by a current religious authority or clergy that expressed negative sentiments about evolution?
- a. Yes
  - b. No
21. How much do you agree with this statement: The teaching of evolution was a controversial issue in your family.
- a. Strongly Agree
  - b. Agree

- c. Disagree
  - d. Strongly Disagree
22. How much do you think your parent's opinion of evolution has influenced your own views on the subject?
- a. Very strongly influenced
  - b. Somewhat influenced
  - c. Influenced very little
  - d. Has had no influence
23. How much do you think the opinion of your parent(s) about evolution has been influenced by their own educational experience?
- a. Very strongly influenced
  - b. Somewhat influenced
  - c. Influenced very little
  - d. Has had no influence
24. How much do you agree with this statement: "The teaching of evolution was a politically controversial issue in my community."
- a. Strongly Agree
  - b. Agree
  - c. Disagree
  - d. Strongly Disagree
25. How much do you agree with this statement: "It is immoral to alter embryonic DNA."
- a. Strongly Agree
  - b. Agree
  - c. Disagree
  - d. Strongly Disagree
26. How much do you agree with this statement: "Alternative ideas to evolution (e.g., Intelligent Design, Creationism) should be taught in a biology course."
- a. Strongly Agree
  - b. Agree
  - c. Disagree
  - d. Strongly Disagree
27. Science has shown vaccines to be highly effective with very low risk. Putting aside the issue of a parent's right to choose, do you agree that children should be vaccinated?
- a. Strongly Agree
  - b. Agree
  - c. Disagree
  - d. Strongly Disagree
28. What is your opinion on the issue of climate change?
- a. Climate change is real and is influenced by human activity.
  - b. Climate change is real but is NOT influenced by human activity.
  - c. There are no valid data suggesting that climate change is real.
  - d. I have no opinion on this issue.
29. When someone is trained in science, they can no longer be religious.
- a. Strongly Agree
  - b. Agree
  - c. Disagree

- d. Strongly Disagree
30. The concepts of science are frequently in conflict with your religious community's sacred scriptures.
- a. Strongly Agree
  - b. Agree
  - c. Disagree
  - d. Strongly Disagree
31. Please rank your agreement with the statement below for each scientific advancements (1 being most strongly DISAGREE and 4 being most strongly AGREE):
- “The technological and scientific advances of the past centuries have changed the world. However, there are many negative consequences of this because the changes are often unnatural.”
- \_\_\_ Genetically Modified Organisms (GMOs)
  - \_\_\_ Reproductive technology
  - \_\_\_ Gene therapy
  - \_\_\_ Stem cells
  - \_\_\_ Cloning
32. Extensive testing by the United States has shown the drug Laetrile (an extract from apricot pits) to be ineffective in the cure of cancer. The drug cannot be legally used in the United States; it is legal in other countries. Do you agree with the following statement: “If I am diagnosed with cancer, I would try Laetrile as a potential cure.”
- a. Strongly Agree
  - b. Agree
  - c. Disagree
  - d. Strongly Disagree
33. How much do you agree with this statement: “Altering human DNA to treat adult disease is immoral.”
- a. Strongly Agree
  - b. Agree
  - c. Disagree
  - d. Strongly Disagree
